# Supplementary material for: Community-Associated Staphylococcus aureus from Sub-Saharan Africa and Germany: A Cross-Sectional Geographic Correlation Study
Source: PubMed Central journal article supplement (PMC5428059; doi:10.1038/s41598-017-00214-8), 2017-03-13
Supplement: 41598_2017_214_MOESM1_ESM.pdf [file 41598_2017_214_MOESM1_ESM.pdf]

# Supporting Information

## Community-Associated *Staphylococcus aureus* from Sub-Saharan Africa and Germany: A Cross-Sectional Geographic Correlation Study

Ulla Ruffing<sup>1</sup>, Abraham Alabi<sup>2\*</sup>, Theckla Kazimoto<sup>3\*</sup>, Delfino C. Vubil<sup>4\*</sup>, Ruslan Akulenko<sup>5\*</sup>, Salim Abdulla<sup>3</sup>, Pedro Alonso<sup>4,6</sup>, Markus Bischoff<sup>1</sup>, Anja Germann<sup>7</sup>, Martin P. Grobusch<sup>2,8</sup>, Volkhard Helms<sup>5</sup>, Jonas Hoffmann<sup>9</sup>, Winfried V. Kern<sup>9</sup>, Peter G. Kremsner<sup>2,10</sup>, Inacio Mandomando<sup>4</sup>, Alexander Mellmann<sup>11</sup>, Georg Peters<sup>12</sup>, Frieder Schaumburg<sup>12</sup>, Sabine Schubert<sup>1</sup>, Lena Strauß<sup>11</sup>, Marcel Tanner<sup>3,13</sup>, Hagen von Briesen<sup>7</sup>, Laura Wende<sup>1</sup>, Lutz von Müller<sup>1</sup>, Mathias Herrmann<sup>1#</sup>

<sup>1</sup> Institute of Medical Microbiology and Hygiene, Saarland University, Homburg, Germany, <sup>2</sup> Centre de Recherches Médicales de Lambaréné (CERMEL), Albert Schweitzer Hospital, Lambaréné, Gabon; <sup>3</sup> Ifakara Health Research and Development Centre (IHRDC), Dar es Salaam, Tanzania; <sup>4</sup> Manhiça Health Research Center, Manhiça, Mozambique; <sup>5</sup> Center for Bioinformatics, Saarland University, Saarbrücken, Germany; <sup>6</sup> Department of Public Health, University of Barcelona, Spain; <sup>7</sup> Fraunhofer Institute for Biomedical Engineering, St. Ingbert, Germany; <sup>8</sup> Center of Tropical Medicine and Travel Medicine, Department of Infectious Diseases, Division of Internal Medicine, University of Amsterdam, Amsterdam, The Netherlands; <sup>9</sup> Division of Infectious Diseases and Travel Medicine, University of Freiburg, Germany; <sup>10</sup> Institute of Tropical Medicine, University of Tübingen, Deutsches Zentrum für Infektionsforschung, Tübingen, Germany; <sup>11</sup> Institute of Hygiene, University Hospital Münster, Münster, Germany; <sup>12</sup> Institute of Medical Microbiology, University Hospital Münster, Münster, Germany; <sup>13</sup> Swiss Tropical and Public Health Institute, Basel, Switzerland

\*second authors, equal contribution

# Corresponding author. Current address: University of Münster Medical Faculty, Domagkstr. 3, 48149 Münster, Germany, Phone: +49-251-8355491, Email: mathias.herrmann@uni-muenster.de



Table S1: Microarray target recognition

|                  |                    | All Isolates    |                 |                  |                   |                   | Clinical Isolates |                 |                  |                  |                   |
|------------------|--------------------|-----------------|-----------------|------------------|-------------------|-------------------|-------------------|-----------------|------------------|------------------|-------------------|
|                  |                    | German, n (%)   | African, n (%)  | OR               | CI <sub>95</sub>  | P                 | German, n (%)     | African, n (%)  | OR               | CI <sub>95</sub> | P                 |
| Regulatory genes | sarA               | 599 (100)       | 600 (100)       | n/a              |                   |                   | 300 (100)         | 300 (100)       | n/a              |                  |                   |
|                  | saeS               | 600 (100)       | 600 (100)       | n/a              |                   |                   | 300 (100)         | 300 (100)       | n/a              |                  |                   |
|                  | vraS               | 600 (100)       | 599 (100)       | n/a              |                   |                   | 300 (100)         | 300 (100)       | n/a              |                  |                   |
|                  | <b>agrI total.</b> | <b>331 (55)</b> | <b>209 (35)</b> | <b>2.30</b>      | <b>1.82-2.91</b>  | <b>&lt;0.0001</b> | <b>179 (60)</b>   | <b>99 (33)</b>  | <b>3.00</b>      | <b>2.15-4.19</b> | <b>&lt;0.0001</b> |
|                  | agrII.total        | 151 (25)        | 161 (27)        | 0.92             | 0.71-1.19         | ns                | 179 (60)          | 99 (33)         | 0.83             | 0.57-1.21        | <0.0001           |
|                  | agrIII.total       | 84 (14)         | 93 (16)         | 0.89             | 0.65-1.22         | ns                | 68 (23)           | 78 (26)         | 0.83             | 0.57-1.21        | ns                |
|                  | <b>agrIV.total</b> | <b>38 (6)</b>   | <b>221 (37)</b> | <b>0.12</b>      | <b>0.08-0.17</b>  | <b>&lt;0.0001</b> | <b>36 (12)</b>    | <b>50 (17)</b>  | <b>0.10</b>      | <b>0.06-0.16</b> | <b>ns</b>         |
| Toxins           | tst1..consensus    | 67 (11)         | 36 (6)          | 1.96             | 1.29-3.00         | ns                | 23 (8)            | 12 (4)          | 1.9              | 0.97-4.08        | ns                |
|                  | sea                | 68 (11)         | 92 (15)         | 0.71             | 0.50-0.99         | ns                | 28 (9)            | 44 (15)         | 0.60             | 0.36-0.99        | ns                |
|                  | <b>seb</b>         | <b>45 (8)</b>   | <b>114 (19)</b> | <b>0.35</b>      | <b>0.24-0.50</b>  | <b>&lt;0.0001</b> | <b>23 (8)</b>     | <b>72 (24)</b>  | <b>0.26</b>      | <b>0.16-0.43</b> | <b>&lt;0.0001</b> |
|                  | <b>sec</b>         | <b>92 (15)</b>  | <b>49 (8)</b>   | <b>2.07</b>      | <b>1.41-2.94</b>  | <b>0.02</b>       | <b>57 (19)</b>    | <b>19 (6)</b>   | <b>3.47</b>      | <b>2.01-5.99</b> | <b>0.001</b>      |
|                  | <b>sed</b>         | <b>52 (9)</b>   | <b>21 (4)</b>   | <b>2.62</b>      | <b>1.56-4.40</b>  | <b>0.03</b>       | <b>35 (12)</b>    | <b>9 (3)</b>    | <b>4.27</b>      | <b>2.02-9.05</b> | <b>0.01</b>       |
|                  | see                | 1 (0)           | 0 (0)           | n/a              |                   |                   | 1 (0)             | 0 (0)           | n/a              |                  | ns                |
|                  | seh                | 26 (4)          | 34 (6)          | 0.75             | 0.45-1.27         | ns                | 12 (4)            | 18 (6)          | 0.65             | 0.31-1.38        | ns                |
|                  | sej                | 41 (7)          | 25 (4)          | 1.69             | 1.01-1.06         | 0.01.             | 27 (9)            | 10 (3)          | 2.87             | 1.37-6.04        | ns                |
|                  | sek                | 27 (5)          | 56 (9)          | 0.46             | 0.29-0.74         | ns                | 14 (5)            | 27 (9)          | 0.50             | 0.25-0.96        | ns                |
|                  | <b>sel</b>         | <b>92 (15)</b>  | <b>50 (8)</b>   | <b>1.99</b>      | <b>1.38-2.87</b>  | <b>0.03</b>       | <b>57 (19)</b>    | <b>20 (7)</b>   | <b>3.28</b>      | <b>1.92-5.62</b> | <b>0.002</b>      |
|                  | <b>egc total</b>   | <b>332 (55)</b> | <b>253 (42)</b> | <b>1.70</b>      | <b>1.35-2.14</b>  | <b>0.02</b>       | <b>173 (58)</b>   | <b>120 (40)</b> | <b>2.04</b>      | <b>1.48-2.83</b> | <b>0.04</b>       |
|                  | seq                | 27 (5)          | 56 (9)          | 0.46             | 0.29-0.74         | ns                | 14 (5)            | 27 (9)          | 0.50             | 0.25-0.96        | ns                |
|                  | ser                | 37 (6)          | 20 (3)          | 1.91             | 1.09-3.32         | ns                | 24 (8)            | 8 (3)           | 3.17             | 1.40-7.18        | ns                |
|                  | lukF               | 599 (100)       | 596 (99)        | 4.02             | 0.45-36.07        | ns                | 300 (100)         | 297 (99)        | 0.99             | 0.98-1.00        | ns                |
|                  | lukS               | 585 (98)        | 510 (85)        | 6.88             | 3.93-12.04        | ns                | 293 (98)          | 244 (81)        | 9.61             | 4.30-21.46       | ns                |
|                  | hlgA               | 597 (100)       | 595 (99)        | 1.67             | 0.40-7.03         | ns                | 299 (100)         | 296 (99)        | 4.04             | 0.45-36.37       | ns                |
|                  | <b>lukF.PV</b>     | <b>15 (3)</b>   | <b>272 (45)</b> | <b>0.03</b>      | <b>0.02-0.05</b>  | <b>&lt;0.0001</b> | <b>15 (5)</b>     | <b>187 (62)</b> | <b>0.03</b>      | <b>0.02-0.06</b> | <b>&lt;0.0001</b> |
|                  | <b>lukS.PV</b>     | <b>15 (3)</b>   | <b>273 (46)</b> | <b>0.03</b>      | <b>0.02-0.05</b>  | <b>&lt;0.0001</b> | <b>15 (5)</b>     | <b>188 (63)</b> | <b>0.03</b>      | <b>0.02-0.06</b> | <b>&lt;0.0001</b> |
|                  | lukM               | 1 (0)           | 0 (0)           | n/a              |                   |                   | 0 (0)             | 0 (0)           | n/a              |                  |                   |
|                  | <b>lukD</b>        | <b>331 (55)</b> | <b>424 (71)</b> | <b>0.51</b>      | <b>0.40-0.65</b>  | <b>0.004</b>      | <b>166 (55)</b>   | <b>215 (72)</b> | <b>0.49</b>      | <b>0.35-0.69</b> | <b>ns</b>         |
| <b>lukE</b>      | <b>326 (54)</b>    | <b>435 (73)</b> | <b>0.45</b>     | <b>0.36-0.57</b> | <b>&lt;0.0001</b> | <b>166 (55)</b>   | <b>220 (73)</b>   | <b>0.45</b>     | <b>0.32-0.63</b> | <b>0.08</b>      |                   |
| hla              | 597 (100)          | 598 (100)       | 0.67            | 0.11-4.0         | ns                | 297 (99)          | 300 (100)         | n/a             |                  |                  |                   |
| h1b              | 423 (71)           | 351 (59)        | 1.70            | 1.33-2.15        | ns                | 223 (74)          | 185 (62)          | 1.8             | 1.27-2.55        | ns               |                   |
| h1d              | 600 (100)          | 600 (100)       | n/a             |                  |                   | 300 (100)         | 300 (100)         | n/a             |                  |                  |                   |
| etA              | 24 (4)             | 39 (7)          | 0.60            | 0.36-1.01        | ns                | 9 (3)             | 19 (6)            | 0.46            | 0.20-1.03        | ns               |                   |
| etB              | 7 (1)              | 21 (4)          | 0.33            | 0.14-0.78        | ns                | 4 (1)             | 12 (4)            | 0.32            | 0.10-1.02        | ns               |                   |
| etD              | 17 (3)             | 21 (4)          | 0.80            | 0.42-1.54        | ns                | 9 (3)             | 10 (3)            | 0.90            | 0.36-2.24        | ns               |                   |
| Immune evasion   | sak                | 466 (78)        | 477 (80)        | 0.90             | 0.68-1.18         | ns                | 243 (81)          | 246 (82)        | 0.94             | 0.62-1.41        | ns                |
|                  | chp                | 353 (59)        | 311 (52)        | 1.33             | 1.06-1.67         | ns                | 173 (58)          | 134 (45)        | 1.69             | 1.22-2.33        | ns                |
|                  | scn                | 552 (92)        | 589 (98)        | 0.21             | 0.11-0.42         | ns                | 276 (92)          | 298 (99)        | 0.08             | 0.02-0.33        | ns                |
|                  | <b>edinA</b>       | <b>2 (0)</b>    | <b>26 (4)</b>   | <b>0.07</b>      | <b>0.02-0.31</b>  | <b>0.001</b>      | <b>2 (1)</b>      | <b>13 (4)</b>   | <b>0.15</b>      | <b>0.03-0.66</b> | <b>ns</b>         |
|                  | <b>edinB</b>       | <b>18 (3)</b>   | <b>103 (17)</b> | <b>0.15</b>      | <b>0.09-0.25</b>  | <b>&lt;0.0001</b> | <b>10 (3)</b>     | <b>67 (22)</b>  | <b>0.12</b>      | <b>0.06-0.24</b> | <b>&lt;0.0001</b> |
|                  | edinC              | 5 (1)           | 16 (3)          | 0.31             | 0.11-0.84         | ns                | 3 (1)             | 8 (3)           | 0.37             | 0.09-1.40        | ns                |

|                           |                  |                 |                 |             |                   |                   |                 |                 |             |                   |                   |
|---------------------------|------------------|-----------------|-----------------|-------------|-------------------|-------------------|-----------------|-----------------|-------------|-------------------|-------------------|
|                           | ACME total       | 2 (0)           | 2 (0)           | 1.00        | 0.14-7.12         | ns                | 2 (1)           | 2 (1)           | 1.00        | 0.14-7.15         | ns                |
|                           | <b>isaB</b>      | <b>371 (62)</b> | <b>529 (88)</b> | <b>0.22</b> | <b>0.16-0.29</b>  | <b>&lt;0.0001</b> | <b>184 (61)</b> | <b>287 (96)</b> | <b>0.07</b> | <b>0.04-0.13</b>  | <b>&lt;0.0001</b> |
|                           | mprF             | 528 (88)        | 482 (80)        | 1.80        | 1.30-2.47         | ns                | 273 (91)        | 237 (79)        | 2.69        | 1.66-4.36         | ns                |
| Proteases                 | aur              | 553 (92)        | 585 (98)        | 0.30        | 0.17-0.55         | ns                | 278 (91)        | 296 (99)        | 0.17        | 0.06-0.50         | ns                |
|                           | splA             | 338 (56)        | 397 (66)        | 0.66        | 0.52-0.83         | ns                | 167 (56)        | 194 (65)        | 0.69        | 0.49-0.95         | ns                |
|                           | <b>splB</b>      | <b>335 (56)</b> | <b>434 (72)</b> | <b>0.48</b> | <b>0.38-0.62</b>  | <b>0.001</b>      | <b>166 (55)</b> | <b>222 (74)</b> | <b>0.44</b> | <b>0.31-0.61</b>  | <b>ns</b>         |
|                           | splE             | 318 (53)        | 232 (39)        | 1.79        | 1.42-2.25         | 0.003             | 144 (48)        | 107 (36)        | 1.67        | 1.20-2.31         | ns                |
|                           | sspA             | 599 (100)       | 598 (100)       | 2.00        | 0.18-22.15        | ns                | 299 (100)       | 299 (100)       | 1.00        | 0.06-16.06        | ns                |
|                           | sspB             | 599 (100)       | 599 (100)       | 1.00        | 0.06-16.03        | ns                | 299 (100)       | 300 (100)       | n/a         |                   |                   |
|                           | sspP             | 598 (100)       | 599 (100)       | 0.5         | 0.05-5.52         | ns                | 299 (100)       | 300 (100)       | n/a         |                   |                   |
| Capsule and Biofilm Genes | cap 5            | 224 (37)        | 237 (40)        | 0.91        | 0.875-1.393       | ns                | 126 (42)        | 107 (36)        | 1.31        | 0.94-1.81         | ns                |
|                           | cap 8            | 376 (63)        | 362 (60)        | 1.10        | 0.72-1.14         | ns                | 174 (58)        | 193 (64)        | 0.77        | 0.55-1.06         | ns                |
|                           | icaA             | 600 (100)       | 598 (100)       | n/a         |                   | ns                | 300 (100)       | 298 (99)        | n/a         |                   |                   |
|                           | icaC             | 597 (100)       | 514 (86)        | 33.30       | 10.47-105.91      | ns                | 298 (99)        | 243 (81)        | 34.95       | 8.45-144.62       | ns                |
|                           | icaD             | 600 (100)       | 596 (99)        | n/a         |                   | ns                | 300 (100)       | 298 (99)        | n/a         |                   | ns                |
| Adhesins                  | bbp total        | 543 (91)        | 575 (96)        | 0.41        | 0.26-0.67         | ns                | 271 (90)        | 286 (95)        | 0.46        | 0.24-0.89         | ns                |
|                           | clfA total       | 600 (100)       | 600 (100)       | n/a         |                   | ns                | 300 (100)       | 300 (100)       | n/a         |                   |                   |
|                           | clfB             | 597 (100)       | 600 (100)       | n/a         |                   | ns                | 299 (100)       | 300 (100)       | n/a         |                   |                   |
|                           | cna              | 284 (47)        | 321 (54)        | 0.78        | 0.62-0.98         | ns                | 148 (49)        | 170 (57)        | 0.75        | 0.54-1.03         | ns                |
|                           | ebh              | 553 (92)        | 594 (99)        | 0.12        | 0.05-0.28         | ns                | 270 (90)        | 299 (100)       | 0.03        | 0.004-0.22        | ns                |
|                           | ebpS             | 599 (100)       | 597 (100)       | 3.01        | 0.31-29.02        | ns                | 300 (100)       | 298 (99)        | n/a         |                   |                   |
|                           | eno              | 600 (100)       | 599 (100)       | n/a         |                   |                   | 300 (100)       | 299 (100)       | n/a         |                   |                   |
|                           | fib              | 372 (62)        | 448 (75)        | 0.55        | 0.43-0.71         | ns                | 184 (61)        | 231 (77)        | 0.47        | 0.33-0.68         | ns                |
|                           | fnbA total       | 594 (99)        | 592 (99)        | 1.34        | 0.46-3.88         | ns                | 298 (99)        | 298 (99)        | 1.00        | 0.14-1.15         | ns                |
|                           | fnbB total       | 522 (87)        | 587 (98)        | 0.15        | 0.08-0.27         | ns                | 262 (87)        | 294 (98)        | 0.14        | 0.06-0.34         | ns                |
|                           | <b>map total</b> | <b>582 (97)</b> | <b>494 (82)</b> | <b>6.94</b> | <b>4.15-11.60</b> | <b>0.02</b>       | <b>290 (97)</b> | <b>233 (78)</b> | <b>8.34</b> | <b>4.20-16.57</b> | <b>ns</b>         |
|                           | <b>sasG</b>      | <b>253 (42)</b> | <b>370 (62)</b> | <b>0.4</b>  | <b>0.36-0.57</b>  | <b>&lt;0.0001</b> | <b>134 (45)</b> | <b>161 (54)</b> | <b>0.7</b>  | <b>0.51-0.96</b>  | <b>ns</b>         |
|                           | sdrC..total.     | 595 (99)        | 518 (86)        | 18.84       | 7.58-46.82        | ns                | 296 (99)        | 243 (81)        | 17.36       | 6.2-48.52         | ns                |
|                           | sdrD             | 527 (88)        | 555 (93)        | 0.59        | 0.40-0.87         | ns                | 265 (88)        | 278 (93)        | 0.60        | 0.34-1.05         | ns                |
|                           | vwb..total.      | 599 (100)       | 599 (100)       | 1.00        | 0.06-16.03        | ns                | 300 (100)       | 300 (100)       | n/a         |                   | ns                |

NB: in bold are targets with a >2-fold or <0.5-fold, statistically different OR of target recognition when comparing German versus African isolates.

Table S2: Rates of *in vitro* antibiotic resistance of *Staphylococcus aureus* from colonization and infection in Africa and Germany

| Source       | Antimicrobial agent           | Resistant isolates, % (n) |                 | p value |
|--------------|-------------------------------|---------------------------|-----------------|---------|
|              |                               | Africa (n=300)            | Germany (n=300) |         |
| Colonization | Cefoxitin                     | 2.3% (7)                  | 0.7% (2)        | ns      |
|              | Tetracycline                  | 35.6% (107)               | 8% (24)         | <0.001  |
|              | Erythromycin                  | 20.3% (61)                | 15.7% (47)      | ns      |
|              | Clindamycin                   | 4.7% (14)                 | 12.7% (38)      | 0.005   |
|              | Gentamicin                    | 5% (15)                   | 0.3% (1)        | 0.006   |
|              | Trimethoprim-sulfamethoxazole | 18.3% (55)                | 0.3% (1)        | <0.001  |
| Infection    | Cefoxitin                     | 3.3% (10)                 | 7.3% (22)       | ns      |
|              | Tetracycline                  | 49.7% (149)               | 5.7% (17)       | <0.001  |
|              | Erythromycin                  | 18.7% (56)                | 19.7% (59)      | ns      |
|              | Clindamycin                   | 3.7% (11)                 | 14.3% (43)      | <0.001  |
|              | Gentamicin                    | 1% (3)                    | 2.6% (8)        | ns      |
|              | Trimethoprim-sulfamethoxazole | 19.2% (58)                | 1.3% (4)        | <0.001  |

NS=not statistically significant
